# Supplementary material
Source: HighWire-hosted journal article supplement (https://bmjopen.bmj.com/content/8/7/e022378)
Supplement: inline-supplementary-material-1 [file inline-supplementary-material-1.pdf]

Supplementary Table 1. Exposure and Cancer Site Associations to be Included in the ComPARE project\*

| Cancer Site of Interest                  | Associated Modifiable Risk Factors                                                                                                                                                                                                                                                            |
|------------------------------------------|-----------------------------------------------------------------------------------------------------------------------------------------------------------------------------------------------------------------------------------------------------------------------------------------------|
| Lung                                     | Non-starchy vegetable intake<br>Fruit intake<br>Physical activity<br>Active tobacco smoking<br>Passive tobacco smoking<br>Air pollution<br>Radon<br>Arsenic                                                                                                                                   |
| Breast                                   | Oral contraceptives<br>Hormone replacement therapy<br>Insufficient fruit<br>Alcohol<br>Red meat<br>Processed meat<br>Insufficient vitamin D<br>Overweight/Obesity<br>Physical inactivity<br>Sedentary behavior<br>Abdominal obesity                                                           |
| Colorectal Cancer                        | Insufficient fruit<br>Insufficient non-starchy vegetables<br>Alcohol<br>Red meat intake<br>Processed meat intake<br>Fiber intake<br>Insufficient vitamin D<br>Insufficient calcium<br>Overweight/Obesity<br>Physical inactivity<br>Sedentary behavior<br>Abdominal obesity<br>Tobacco smoking |
| Gastric cancer,<br>Gastric cardia cancer | Insufficient fruit<br>Alcohol<br>Red meat<br>Processed meat<br>Insufficient fibre<br>Overweight/Obesity<br>Tobacco smoking<br><i>Helicobacter pylori</i> (non-cardia only)                                                                                                                    |
| Oesophagus Cancer                        | Overweight/Obesity<br>Physical inactivity<br>Tobacco smoking<br>Alcohol<br>Insufficient non-starchy vegetables<br>Insufficient fruit<br>Processed meat                                                                                                                                        |

|                                 |                                                                                                                                                                                                                                                              |
|---------------------------------|--------------------------------------------------------------------------------------------------------------------------------------------------------------------------------------------------------------------------------------------------------------|
| Bladder Cancer                  | <ul style="list-style-type: none"> <li>Insufficient non-starchy vegetables</li> <li>Insufficient fruit</li> <li>Physical inactivity</li> <li>Tobacco smoking</li> <li>Insufficient vitamin D</li> <li>Arsenic</li> <li>Disinfection by-products</li> </ul>   |
| Pancreas Cancer                 | <ul style="list-style-type: none"> <li>Insufficient non-starchy vegetables</li> <li>Insufficient fruit</li> <li>Alcohol</li> <li>Red meat</li> <li>Processed meat</li> <li>Overweight/Obesity</li> <li>Abdominal obesity</li> <li>Tobacco smoking</li> </ul> |
| Endometrial Cancer              | <ul style="list-style-type: none"> <li>Oral contraceptives</li> <li>Hormone therapy</li> <li>Overweight/Obesity</li> <li>Physical inactivity</li> <li>Sedentary behavior</li> <li>Abdominal obesity</li> </ul>                                               |
| Oral Cancer / Oropharynx Cancer | <ul style="list-style-type: none"> <li>Insufficient non-starchy vegetables</li> <li>Tobacco smoking</li> <li>Human papillomavirus (HPV)</li> </ul>                                                                                                           |
| Liver Cancer                    | <ul style="list-style-type: none"> <li>Insufficient non-starchy vegetables</li> <li>Alcohol</li> <li>Overweight/Obesity</li> <li>Physical inactivity</li> <li>Tobacco smoking</li> <li>Hepatitis B virus (HBV)</li> <li>Hepatitis C virus (HCV)</li> </ul>   |
| Ovarian Cancer                  | <ul style="list-style-type: none"> <li>Oral contraceptives</li> <li>Hormone Replacement therapy</li> <li>Insufficient non-starchy vegetables</li> <li>Overweight/Obesity</li> <li>Sedentary behavior</li> <li>Tobacco smoking</li> </ul>                     |
| Larynx Cancer                   | <ul style="list-style-type: none"> <li>Alcohol</li> <li>Insufficient non-starchy vegetables</li> <li>Tobacco smoking</li> <li>Human papillomavirus (HPV)</li> </ul>                                                                                          |
| Cervical Cancer                 | <ul style="list-style-type: none"> <li>Tobacco smoking</li> <li>Passive (second-hand) tobacco smoking</li> <li>Human papillomavirus (HPV)</li> </ul>                                                                                                         |
| Prostate Cancer                 | <ul style="list-style-type: none"> <li>Overweight/Obesity</li> <li>Abdominal obesity</li> </ul>                                                                                                                                                              |
| Kidney Cancer                   | <ul style="list-style-type: none"> <li>Overweight/Obesity</li> <li>Abdominal obesity</li> <li>Physical inactivity</li> <li>Tobacco smoking</li> <li>Vitamin D</li> </ul>                                                                                     |

|                                            |                                                                                                                   |
|--------------------------------------------|-------------------------------------------------------------------------------------------------------------------|
| Gallbladder Cancer                         | Tobacco smoking<br>Overweight/Obesity                                                                             |
| Melanoma                                   | Ultraviolet radiation (indoor tanning, sunburn, sunbathing, total exposure)                                       |
| Hodgkin Lymphoma                           | Epstein-Barr Virus (EBV)                                                                                          |
| Non-Hodgkin Lymphoma                       | Physical inactivity<br>Epstein-Barr Virus (EBV)(immuno-suppressed only)<br>Hepatitis C virus (HCV)                |
| Non-Melanoma Skin Cancer                   | Human Immunodeficiency virus (HIV)<br>Ultraviolet radiation (indoor tanning, sunburn, sunbathing, total exposure) |
| Nasopharyngeal Cancer                      | Epstein-Barr Virus (EBV)                                                                                          |
| Pharynx Cancer                             | HPV                                                                                                               |
| Thyroid Cancer                             | Overweight/Obesity<br>Abdominal Obesity                                                                           |
| Anal Cancer                                | Human papillomavirus (HPV)                                                                                        |
| Cholangiocarcinoma                         | Hepatitis B virus (HBV)<br>Hepatitis C virus (HCV)                                                                |
| Leukemia                                   | Human T-cell lymphotropic virus type 1 (HTLV-1)                                                                   |
| Burkitt Lymphoma                           | Epstein-Barr Virus (EBV)                                                                                          |
| Eye Cancer                                 | UV radiation                                                                                                      |
| Kaposi Sarcoma                             | Human herpesvirus 8                                                                                               |
| Lip Cancer                                 | UV radiation (indoor tanning, sunburn, sunbathing, total exposure)                                                |
| Extranodal NK/T cell lymphoma – nasal type | Epstein-Barr Virus (EBV)                                                                                          |
| Mesothelioma                               | Asbestos                                                                                                          |
| Penile Cancer                              | Human papillomavirus (HPV)                                                                                        |
| Tonsil Cancer                              | Human papillomavirus (HPV)                                                                                        |
| Vaginal Cancer                             | Human papillomavirus (HPV)                                                                                        |
| Vulvar Cancer                              | Human papillomavirus (HPV)                                                                                        |

\*inclusion of exposure and cancer site associations were based on hierarchy of evidence collected from the International Agency for Research on Cancer monograph series, World Cancer Research Fund (WCRF) Second Expert Report, WCRF Continuous Update Projects and published meta-analyses of epidemiologic studies.
