# Supplementary material
Source: HighWire-hosted journal article supplement (https://bmjopen.bmj.com/content/8/7/e022378)
Supplement: inline-supplementary-material-2 [file inline-supplementary-material-2.pdf]

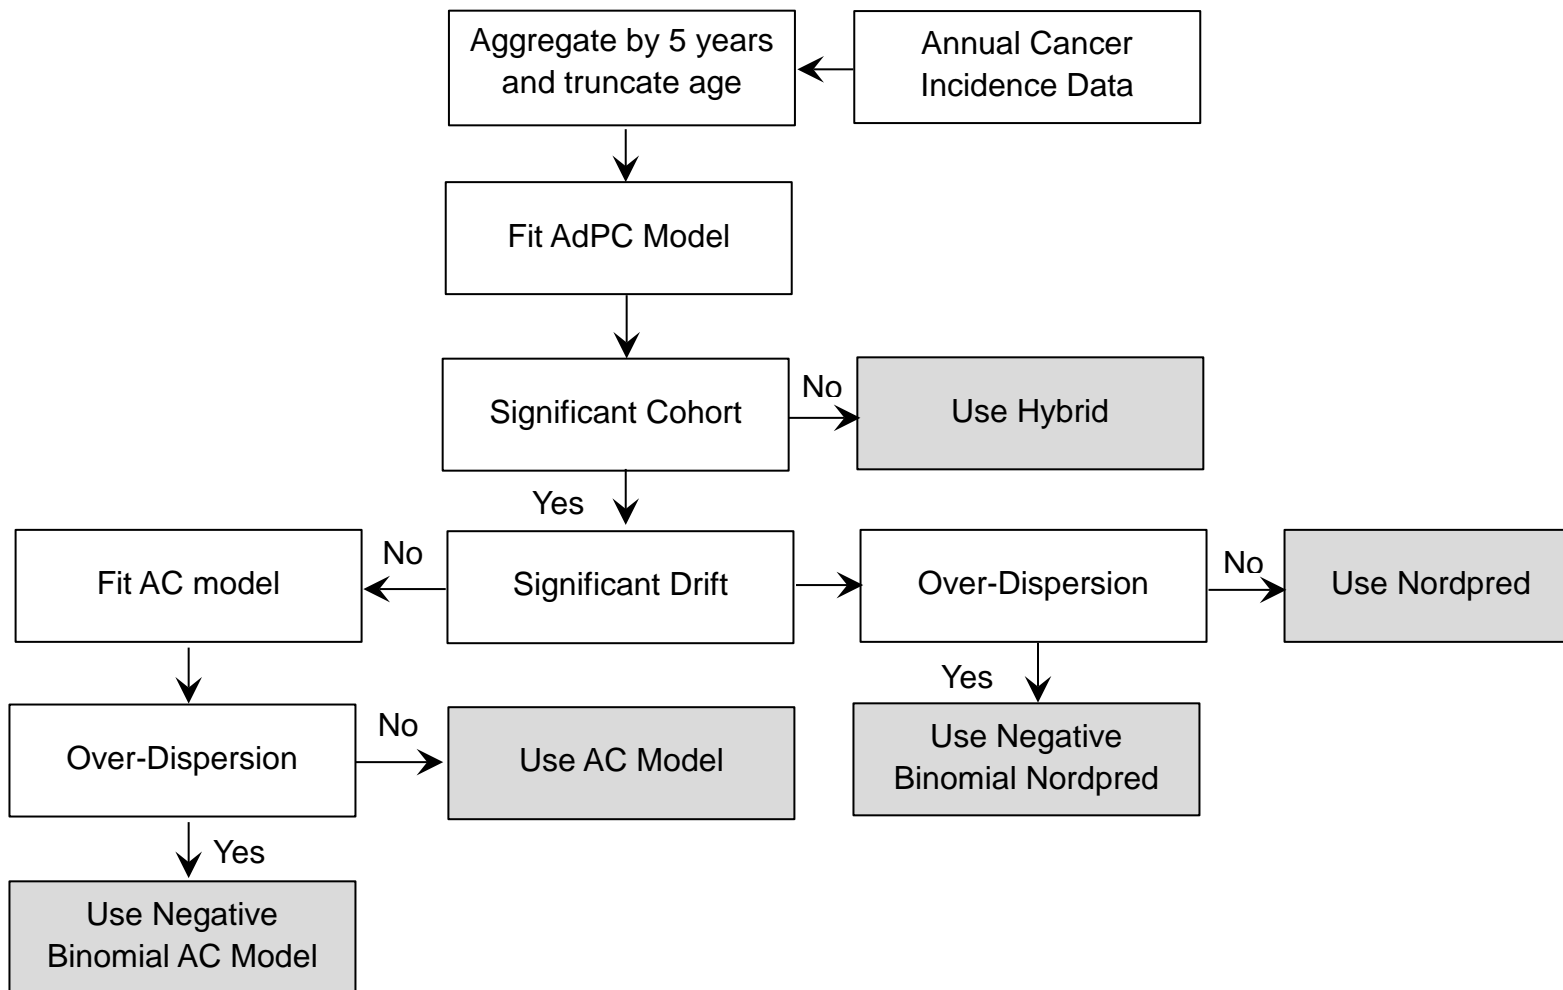

Supplementary Figure 1. Decision tree for cancer incidence projection model selection in Canproj.AC= Age-cohort model, AdPC= Age-drift-period-cohort model, Hybrid=age-only model or age-period model

\*Adapted from: *Canproj-The R package of cancer projection methods based on generalized linear models for age, period and/or cohort. Alberta Health Services: 2011-12-16.*
